# Supplementary material
Source: publisher figshare collection journal article supplement (https://gsapubs.figshare.com/articles/dataset/_/24492283)
Supplement: Supplementary file 1 [file 1]

## Sheet: Sheet2
CITATION	LOCATION	ROCK TYPE	ROCK NAME	SiO2 (wt.%)	TiO2 (wt.%)	Al2O3 (wt.%)	Fe2O3 (wt.%)	FeO (wt.%)	CaO (wt.%)	MgO (wt.%)	TOTAL	LOSS ON IGNITION
[8808] CHEN SHU-MIN (2005)	WEST AUSTRALIAN CRATON / YILGARN CRATON / SOUTHERN CROSS SUPERTERRANE / SANDSTONE GREENSTONE BELT	VOLCANIC ROCK	KOMATIITE	42.53	0.28	6.1	1.74	7.2	5.49	24.44	87.78	12.22
[8808] CHEN SHU-MIN (2005)	WEST AUSTRALIAN CRATON / YILGARN CRATON / SOUTHERN CROSS SUPERTERRANE / SANDSTONE GREENSTONE BELT	VOLCANIC ROCK	KOMATIITE	38.13	0.55	6.54	1.05	7.87	8.13	17.86	80.13	19.87
[8808] CHEN SHU-MIN (2005)	WEST AUSTRALIAN CRATON / YILGARN CRATON / SOUTHERN CROSS SUPERTERRANE / SANDSTONE GREENSTONE BELT	VOLCANIC ROCK	KOMATIITE	44.27	0.74	8.87	2.62	9.91	5.8	18.32	90.53	9.47
[8808] CHEN SHU-MIN (2005)	WEST AUSTRALIAN CRATON / YILGARN CRATON / SOUTHERN CROSS SUPERTERRANE / SANDSTONE GREENSTONE BELT	VOLCANIC ROCK	KOMATIITE	40.91	0.34	3.95	4.94	5.49	3.83	26.5	85.96	14.04
[8808] CHEN SHU-MIN (2005)	WEST AUSTRALIAN CRATON / YILGARN CRATON / SOUTHERN CROSS SUPERTERRANE / SANDSTONE GREENSTONE BELT	VOLCANIC ROCK	KOMATIITE	44.98	0.57	7.03	6.31	4.22	6.21	17.82	87.14	12.86
[8808] CHEN SHU-MIN (2005)	WEST AUSTRALIAN CRATON / YILGARN CRATON / SOUTHERN CROSS SUPERTERRANE / SANDSTONE GREENSTONE BELT	VOLCANIC ROCK	KOMATIITE	43.93	0.45	7.92	5.29	4.84	5.04	19.24	86.71	13.29
[8808] CHEN SHU-MIN (2005)	WEST AUSTRALIAN CRATON / YILGARN CRATON / SOUTHERN CROSS SUPERTERRANE / SANDSTONE GREENSTONE BELT	VOLCANIC ROCK	KOMATIITE	43.26	0.67	6.58	3.68	7.2	5.85	22.3	89.54	10.46
[8808] CHEN SHU-MIN (2005)	WEST AUSTRALIAN CRATON / YILGARN CRATON / SOUTHERN CROSS SUPERTERRANE / SANDSTONE GREENSTONE BELT	VOLCANIC ROCK	KOMATIITE	44.97	0.55	7.3	4.14	6.76	6.92	19.03	89.67	10.33
[8808] CHEN SHU-MIN (2005)	WEST AUSTRALIAN CRATON / YILGARN CRATON / SOUTHERN CROSS SUPERTERRANE / SANDSTONE GREENSTONE BELT	VOLCANIC ROCK	KOMATIITE	44.33	0.29	7.33	4	5.34	5.55	22.18	89.02	10.98
[14980] FIORENTINI M. L. (2011)	WEST AUSTRALIAN CRATON / YILGARN CRATON / WEST YILGARN SUPERTERRANE / LAKE JOHNSON GREENSTONE BELT	VOLCANIC ROCK	KOMATIITE	43.18	0.28	3.13	0.63	11.26	2.87	37.85	99.2	0.8
[14980] FIORENTINI M. L. (2011)	WEST AUSTRALIAN CRATON / YILGARN CRATON / WEST YILGARN SUPERTERRANE / LAKE JOHNSON GREENSTONE BELT	VOLCANIC ROCK	KOMATIITE	43.53	0.53	5.44	1.2	13.01	4.81	30.58	99.1	0.9
[15917] THEBAUD N. (2012)	WEST AUSTRALIAN CRATON / YILGARN CRATON / EASTERN GOLDFIELDS SUPERTERRANE / KALGOORLIE TERRANE - AGNEW-WILUNA GREENSTONE BELT	VOLCANIC ROCK	KOMATIITE	42.21	0.59	10.67	1.49	12.08	9.14	20.94	97.12	2.88
[15917] THEBAUD N. (2012)	WEST AUSTRALIAN CRATON / YILGARN CRATON / EASTERN GOLDFIELDS SUPERTERRANE / KALGOORLIE TERRANE - WILDARA-LEONORA BELT	VOLCANIC ROCK	KOMATIITE	40.63	0.06	1.18	0.07	8.31	0.3	48.29	98.84	1.16
[15917] THEBAUD N. (2012)	WEST AUSTRALIAN CRATON / YILGARN CRATON / EASTERN GOLDFIELDS SUPERTERRANE / KALGOORLIE TERRANE - WILDARA-LEONORA BELT	VOLCANIC ROCK	KOMATIITE	43.09	0.07	1.24	0.15	7.99	0.27	45.93	98.74	1.26
[15917] THEBAUD N. (2012)	WEST AUSTRALIAN CRATON / YILGARN CRATON / EASTERN GOLDFIELDS SUPERTERRANE / KALGOORLIE TERRANE - WILDARA-LEONORA BELT	VOLCANIC ROCK	KOMATIITE	43.24	0.07	1.26	0.16	8.11	0.2	45.6	98.64	1.36
[15917] THEBAUD N. (2012)	WEST AUSTRALIAN CRATON / YILGARN CRATON / EASTERN GOLDFIELDS SUPERTERRANE / KALGOORLIE TERRANE - WILDARA-LEONORA BELT	VOLCANIC ROCK	KOMATIITE	40.2	0.07	1.27	0.35	12.39	0.61	43.85	98.74	1.26
[15917] THEBAUD N. (2012)	WEST AUSTRALIAN CRATON / YILGARN CRATON / EASTERN GOLDFIELDS SUPERTERRANE / KALGOORLIE TERRANE - WILDARA-LEONORA BELT	VOLCANIC ROCK	KOMATIITE	44.62	0.07	1.17	0.19	8.45	0.25	45.1	99.85	0.15
[15917] THEBAUD N. (2012)	WEST AUSTRALIAN CRATON / YILGARN CRATON / EASTERN GOLDFIELDS SUPERTERRANE / KALGOORLIE TERRANE - WILDARA-LEONORA BELT	VOLCANIC ROCK	KOMATIITE	42.16	0.15	2.84	0.44	8.85	5.12	39.38	98.94	1.06
[17508] GODEL B. M. (2013)	WEST AUSTRALIAN CRATON / YILGARN CRATON / EASTERN GOLDFIELDS SUPERTERRANE / KALGOORLIE TERRANE - NORSEMAN-WILUNA GREENSTONE BE	VOLCANIC ROCK	KOMATIITE	44.45	0.03	0.23	0.13	6.48	0.04	48	99.36	0.64
[17508] GODEL B. M. (2013)	WEST AUSTRALIAN CRATON / YILGARN CRATON / EASTERN GOLDFIELDS SUPERTERRANE / KALGOORLIE TERRANE - NORSEMAN-WILUNA GREENSTONE BE	VOLCANIC ROCK	KOMATIITE	44.78	0.01	0.2	0.1	5.53	0.9	48.04	99.56	0.44
[17508] GODEL B. M. (2013)	WEST AUSTRALIAN CRATON / YILGARN CRATON / EASTERN GOLDFIELDS SUPERTERRANE / KALGOORLIE TERRANE - NORSEMAN-WILUNA GREENSTONE BE	VOLCANIC ROCK	KOMATIITE	44.02	0.01	0.21	0	2.28	0.96	51.67	99.15	0.85
[23187] STAUDE S. (2019)	WEST AUSTRALIAN CRATON / YILGARN CRATON / EASTERN GOLDFIELDS SUPERTERRANE / KALGOORLIE TERRANE - KAMBALDA DOMAIN	VOLCANIC ROCK	KOMATIITE	44	0.41	8.81	11.3	8.46	7.91	17.8	98.69	1.31
[23187] STAUDE S. (2019)	WEST AUSTRALIAN CRATON / YILGARN CRATON / EASTERN GOLDFIELDS SUPERTERRANE / KALGOORLIE TERRANE - KAMBALDA DOMAIN	VOLCANIC ROCK	KOMATIITE	42.2	0.16	3.56	7.77	4.81	5.22	26.2	89.92	10.08
[23187] STAUDE S. (2019)	WEST AUSTRALIAN CRATON / YILGARN CRATON / EASTERN GOLDFIELDS SUPERTERRANE / KALGOORLIE TERRANE - KAMBALDA DOMAIN	VOLCANIC ROCK	KOMATIITE	43.7	0.34	7.59	12.1	7.33	5.72	21.5	98.28	1.72
[23187] STAUDE S. (2019)	WEST AUSTRALIAN CRATON / YILGARN CRATON / EASTERN GOLDFIELDS SUPERTERRANE / KALGOORLIE TERRANE - KAMBALDA DOMAIN	VOLCANIC ROCK	KOMATIITE	38.2	0.29	6.26	11.7	6.35	4.16	25.3	92.26	7.74
[23187] STAUDE S. (2019)	WEST AUSTRALIAN CRATON / YILGARN CRATON / EASTERN GOLDFIELDS SUPERTERRANE / KALGOORLIE TERRANE - KAMBALDA DOMAIN	VOLCANIC ROCK	KOMATIITE	41.1	0.3	6.83	10.7	7.23	4.31	21.3	91.77	8.23
[23187] STAUDE S. (2019)	WEST AUSTRALIAN CRATON / YILGARN CRATON / EASTERN GOLDFIELDS SUPERTERRANE / KALGOORLIE TERRANE - KAMBALDA DOMAIN	VOLCANIC ROCK	KOMATIITE	43.8	0.42	9.99	11.8	6.9	5.4	14.8	93.11	6.89
[23187] STAUDE S. (2019)	WEST AUSTRALIAN CRATON / YILGARN CRATON / EASTERN GOLDFIELDS SUPERTERRANE / KALGOORLIE TERRANE - KAMBALDA DOMAIN	VOLCANIC ROCK	KOMATIITE	43.8	0.31	7.15	11.75	5.82	5.56	21.9	96.29	3.71
[23187] STAUDE S. (2019)	WEST AUSTRALIAN CRATON / YILGARN CRATON / EASTERN GOLDFIELDS SUPERTERRANE / KALGOORLIE TERRANE - KAMBALDA DOMAIN	VOLCANIC ROCK	KOMATIITE	44.1	0.33	7.32	11.9	6.28	6.16	23.4	99.49	0.51
[5746] TOMLINSON K. Y. (1999)	SUPERIOR PROVINCE_ARCHEAN / WABIGOON GREENSTONE BELT / CENTRAL WABIGOON GREENSTONE BELT	VOLCANIC ROCK	KOMATIITE, BASALTIC	37.72	1.14	5.12	1.85	13.34	16.21	11.57	86.95	13.05
[5746] TOMLINSON K. Y. (1999)	SUPERIOR PROVINCE_ARCHEAN / WABIGOON GREENSTONE BELT / CENTRAL WABIGOON GREENSTONE BELT	VOLCANIC ROCK	KOMATIITE, BASALTIC	42.17	1.35	5.12	2.02	14.54	7.09	18.43	90.72	9.28
[5746] TOMLINSON K. Y. (1999)	SUPERIOR PROVINCE_ARCHEAN / WABIGOON GREENSTONE BELT / CENTRAL WABIGOON GREENSTONE BELT	VOLCANIC ROCK	KOMATIITE, BASALTIC	42.91	1.31	5.11	1.92	13.82	7.01	19.58	91.66	8.34
[5746] TOMLINSON K. Y. (1999)	SUPERIOR PROVINCE_ARCHEAN / WABIGOON GREENSTONE BELT / CENTRAL WABIGOON GREENSTONE BELT	VOLCANIC ROCK	KOMATIITE, BASALTIC	41.34	1.23	4.47	2.02	14.56	7.29	18.08	88.99	11.01
[5746] TOMLINSON K. Y. (1999)	SUPERIOR PROVINCE_ARCHEAN / WABIGOON GREENSTONE BELT / CENTRAL WABIGOON GREENSTONE BELT	VOLCANIC ROCK	KOMATIITE, BASALTIC	43.9	0.82	11.69	1.7	12.24	9.16	16.37	95.88	4.12
[5891] INNES D. G. (1978)	SUPERIOR PROVINCE_ARCHEAN / ABITIBI GREENSTONE BELT / SOUTHERN ABITIBI VOLCANIC ZONE	VOLCANIC ROCK	KOMATIITE, PERIDOTITIC	41	0.27	4.99	5.6	4.05	1.82	32.4	90.13	9.87
[5891] INNES D. G. (1978)	SUPERIOR PROVINCE_ARCHEAN / ABITIBI GREENSTONE BELT / SOUTHERN ABITIBI VOLCANIC ZONE	VOLCANIC ROCK	KOMATIITE, PERIDOTITIC	36.5	0.15	1.94	9.96	2.28	0.04	37.1	87.97	12.03
[5891] INNES D. G. (1978)	SUPERIOR PROVINCE_ARCHEAN / ABITIBI GREENSTONE BELT / SOUTHERN ABITIBI VOLCANIC ZONE	VOLCANIC ROCK	KOMATIITE, PERIDOTITIC	32.4	0.81	0.83	2.23	4.14	0.63	35.8	76.84	23.16
[5891] INNES D. G. (1978)	SUPERIOR PROVINCE_ARCHEAN / ABITIBI GREENSTONE BELT / SOUTHERN ABITIBI VOLCANIC ZONE	VOLCANIC ROCK	KOMATIITE, PERIDOTITIC	37.2	0.1	1.24	7.53	2.76	0.06	39.3	88.19	11.81
[5891] INNES D. G. (1978)	SUPERIOR PROVINCE_ARCHEAN / ABITIBI GREENSTONE BELT / SOUTHERN ABITIBI VOLCANIC ZONE	VOLCANIC ROCK	KOMATIITE, PERIDOTITIC	35.7	0.73	5.37	5.54	4.64	0.15	35.8	87.93	12.07
[5891] INNES D. G. (1978)	SUPERIOR PROVINCE_ARCHEAN / ABITIBI GREENSTONE BELT / SOUTHERN ABITIBI VOLCANIC ZONE	VOLCANIC ROCK	KOMATIITE	44.5	0.59	8.26	1.91	8.9	8.12	21.7	93.98	6.02
[5891] INNES D. G. (1978)	SUPERIOR PROVINCE_ARCHEAN / ABITIBI GREENSTONE BELT / SOUTHERN ABITIBI VOLCANIC ZONE	VOLCANIC ROCK	KOMATIITE, PYROXENITIC	40.8	0.31	4.8	6.31	6.65	5.67	27.3	91.84	8.16
[5891] INNES D. G. (1978)	SUPERIOR PROVINCE_ARCHEAN / ABITIBI GREENSTONE BELT / SOUTHERN ABITIBI VOLCANIC ZONE	VOLCANIC ROCK	KOMATIITE, PYROXENITIC	42.9	0.29	5.15	3.53	6.9	8.93	24.4	92.1	7.9
[8321] PYKE D. R. (1973)	SUPERIOR PROVINCE_ARCHEAN / ABITIBI GREENSTONE BELT / SOUTHERN ABITIBI VOLCANIC ZONE	VOLCANIC ROCK	KOMATIITE, PERIDOTITIC	39.3	0.17	5.91	3.68	3.31	2.58	33.9	88.85	11.15
[8321] PYKE D. R. (1973)	SUPERIOR PROVINCE_ARCHEAN / ABITIBI GREENSTONE BELT / SOUTHERN ABITIBI VOLCANIC ZONE	VOLCANIC ROCK	KOMATIITE, PERIDOTITIC	41	0.21	5.54	3.46	6.16	4.21	32	92.58	7.42
[8321] PYKE D. R. (1973)	SUPERIOR PROVINCE_ARCHEAN / ABITIBI GREENSTONE BELT / SOUTHERN ABITIBI VOLCANIC ZONE	VOLCANIC ROCK	KOMATIITE, PERIDOTITIC	40.8	0.25	10	2.94	6.49	6.86	23.3	90.64	9.36
[9306] CANIL D. (1987)	SUPERIOR PROVINCE_ARCHEAN / ABITIBI GREENSTONE BELT / SOUTHERN ABITIBI VOLCANIC ZONE	VOLCANIC ROCK	KOMATIITE	44.99	0.46	8.86	2	11.03	8.61	22.87	98.82	1.18
[14400] DAUPHAS N. (2010)	SUPERIOR PROVINCE_ARCHEAN / ABITIBI GREENSTONE BELT / SOUTHERN ABITIBI VOLCANIC ZONE / ALEXO KOMATIITE	VOLCANIC ROCK	KOMATIITE	43.98	0.34	6.52	0.9	9.7	8.34	29.99	99.77	0.23
[5278] JAHN B.-M. (1983)	SAO FRANCISCO CRATON_ARCHEAN / PIUMHI GREENSTONE BELT / PIUMHI MASSIF	VOLCANIC ROCK	KOMATIITE, PERIDOTITIC	39.83	0.26	4.01	4.09	6.19	2.83	32.32	89.53	10.47
[5278] JAHN B.-M. (1983)	SAO FRANCISCO CRATON_ARCHEAN / PIUMHI GREENSTONE BELT / PIUMHI MASSIF	VOLCANIC ROCK	KOMATIITE, PERIDOTITIC	44.3	0.26	4.7	2.7	9.69	4.4	24.2	90.25	9.75
[5278] JAHN B.-M. (1983)	SAO FRANCISCO CRATON_ARCHEAN / PIUMHI GREENSTONE BELT / PIUMHI MASSIF	VOLCANIC ROCK	KOMATIITE, PERIDOTITIC	39.73	0.27	4.1	4.09	5.2	2.84	31.49	87.72	12.28
[5278] JAHN B.-M. (1983)	SAO FRANCISCO CRATON_ARCHEAN / PIUMHI GREENSTONE BELT / PIUMHI MASSIF	VOLCANIC ROCK	KOMATIITE, PERIDOTITIC	44.17	0.45	6.61	1.02	7.76	7.06	25.6	92.67	7.33
[5625] TEIXEIRA N. A. (1979)	SAO FRANCISCO CRATON_ARCHEAN / MORRO DO FERRO GREENSTONE BELT / MORRO DO FERRO GREENSTONE BELT / MORRO DO NIQUEL UNIT	VOLCANIC ROCK	KOMATIITE	43.2	0.63	2.9	3.99	8.07	7.1	27.1	92.99	7.01
[5133] ANHAEUSSER C. R. (2001)	KAAPVAAL CRATON_ARCHEAN / BARBERTON GREENSTONE BELT / NELSHOOGTE SCHIST BELT	VOLCANIC ROCK	KOMATIITE	41.8	0.29	2.92	4.13	6.77	3.78	30	89.69	10.31
[5133] ANHAEUSSER C. R. (2001)	KAAPVAAL CRATON_ARCHEAN / BARBERTON GREENSTONE BELT / NELSHOOGTE SCHIST BELT	VOLCANIC ROCK	KOMATIITE	42.5	0.36	3.77	4.73	6.9	4.86	28.8	91.92	8.08
[5133] ANHAEUSSER C. R. (2001)	KAAPVAAL CRATON_ARCHEAN / BARBERTON GREENSTONE BELT / NELSHOOGTE SCHIST BELT	VOLCANIC ROCK	KOMATIITE	39.21	0.23	3.75	5.1	4.74	2.71	33.44	89.18	10.82
[5133] ANHAEUSSER C. R. (2001)	KAAPVAAL CRATON_ARCHEAN / BARBERTON GREENSTONE BELT / NELSHOOGTE SCHIST BELT	VOLCANIC ROCK	KOMATIITE	41.47	0.24	2.9	4.39	7.16	2.12	30.54	88.82	11.18
[5133] ANHAEUSSER C. R. (2001)	KAAPVAAL CRATON_ARCHEAN / BARBERTON GREENSTONE BELT / NELSHOOGTE SCHIST BELT	VOLCANIC ROCK	KOMATIITE	41.43	0.31	3.08	4.5	5.65	3.15	31.36	89.48	10.52
[5133] ANHAEUSSER C. R. (2001)	KAAPVAAL CRATON_ARCHEAN / BARBERTON GREENSTONE BELT / NELSHOOGTE SCHIST BELT	VOLCANIC ROCK	KOMATIITE	39.45	0.19	2.79	5.17	6.64	0.26	33	87.5	12.5
[5133] ANHAEUSSER C. R. (2001)	KAAPVAAL CRATON_ARCHEAN / BARBERTON GREENSTONE BELT / NELSHOOGTE SCHIST BELT	VOLCANIC ROCK	KOMATIITE	40.73	0.24	2.66	4.32	6.13	3.01	30.91	88	12
[5133] ANHAEUSSER C. R. (2001)	KAAPVAAL CRATON_ARCHEAN / BARBERTON GREENSTONE BELT / NELSHOOGTE SCHIST BELT	VOLCANIC ROCK	KOMATIITE	40.73	0.29	3.45	3.78	7.04	1.73	31.33	88.35	11.65
[5133] ANHAEUSSER C. R. (2001)	KAAPVAAL CRATON_ARCHEAN / BARBERTON GREENSTONE BELT / NELSHOOGTE SCHIST BELT	VOLCANIC ROCK	KOMATIITE	40.6	0.2	2.3	1.9	9.4	1.2	32.2	87.8	12.2
[5133] ANHAEUSSER C. R. (2001)	KAAPVAAL CRATON_ARCHEAN / BARBERTON GREENSTONE BELT / NELSHOOGTE SCHIST BELT	VOLCANIC ROCK	KOMATIITE	40.4	0.2	2.3	1.9	9.7	0.9	32.3	87.7	12.3
[5421] HERMANN A. G. (1976)	KAAPVAAL CRATON_ARCHEAN / BARBERTON GREENSTONE BELT / ONVERWACHT GROUP / KOMATI FORMATION	VOLCANIC ROCK	KOMATIITE, PERIDOTITIC	42.9	0.31	2.6	2.5	7.2	1.8	30	87.31	12.69
[5590] SMITH H. S. (1982)	KAAPVAAL CRATON_ARCHEAN / BARBERTON GREENSTONE BELT / ONVERWACHT GROUP / KOMATI FORMATION	VOLCANIC ROCK	KOMATIITE	44.86	0.28	3.12	2.31	11.53	3.76	33.01	98.87	1.13
[5590] SMITH H. S. (1982)	KAAPVAAL CRATON_ARCHEAN / BARBERTON GREENSTONE BELT / ONVERWACHT GROUP / KOMATI FORMATION	VOLCANIC ROCK	KOMATIITE	44.76	0.47	3.8	2.06	10.29	4.85	32.45	98.68	1.32
[5590] SMITH H. S. (1982)	KAAPVAAL CRATON_ARCHEAN / BARBERTON GREENSTONE BELT / ONVERWACHT GROUP / KOMATI FORMATION	VOLCANIC ROCK	KOMATIITE	44.83	0.32	3.62	2.05	10.23	3.68	34.92	99.65	0.35
[5590] SMITH H. S. (1982)	KAAPVAAL CRATON_ARCHEAN / BARBERTON GREENSTONE BELT / ONVERWACHT GROUP / KOMATI FORMATION	VOLCANIC ROCK	KOMATIITE	44.23	0.33	3.82	1.89	9.44	4.19	34.94	98.84	1.16
[5626] VILJOEN M. J. (1969)	KAAPVAAL CRATON_ARCHEAN / BARBERTON GREENSTONE BELT / ONVERWACHT GROUP / SANDSPRUIT FORMATION	VOLCANIC ROCK	KOMATIITE, PERIDOTITIC	44.85	0.51	2.66	6.9	4.91	7.01	24.96	91.8	8.2
[5626] VILJOEN M. J. (1969)	KAAPVAAL CRATON_ARCHEAN / BARBERTON GREENSTONE BELT / ONVERWACHT GROUP / SANDSPRUIT FORMATION	VOLCANIC ROCK	KOMATIITE, PERIDOTITIC	43.11	1.35	3.41	4.1	6.46	4.84	29.17	92.44	7.56
[6843] DE WIT M. J. (1987)	KAAPVAAL CRATON_ARCHEAN / BARBERTON GREENSTONE BELT / ONVERWACHT GROUP / KROMBERG FORMATION	VOLCANIC ROCK	KOMATIITE	37.3	0.05	2.44	4.85	1.62	0.09	38.7	85.05	14.95
[6877] VILJOEN M. J. (1969)	KAAPVAAL CRATON_ARCHEAN / BARBERTON GREENSTONE BELT / ONVERWACHT GROUP / KOMATI FORMATION	VOLCANIC ROCK	KOMATIITE, PERIDOTITIC, OLIVINE	40.36	0.41	1.97	5.84	3.75	3.45	35.17	90.95	9.05
[6877] VILJOEN M. J. (1969)	KAAPVAAL CRATON_ARCHEAN / BARBERTON GREENSTONE BELT / ONVERWACHT GROUP / KOMATI FORMATION	VOLCANIC ROCK	KOMATIITE, PERIDOTITIC, OLIVINE	39.77	0.23	2.29	5.91	4.38	5.03	31.11	88.72	11.28
[6877] VILJOEN M. J. (1969)	KAAPVAAL CRATON_ARCHEAN / BARBERTON GREENSTONE BELT / ONVERWACHT GROUP / KOMATI FORMATION	VOLCANIC ROCK	KOMATIITE, PERIDOTITIC, OLIVINE	41.92	0.21	3.48	5.21	3.06	3.72	32.13	89.73	10.27
[6877] VILJOEN M. J. (1969)	KAAPVAAL CRATON_ARCHEAN / BARBERTON GREENSTONE BELT / ONVERWACHT GROUP / KOMATI FORMATION	VOLCANIC ROCK	KOMATIITE, PERIDOTITIC	42.06	0.31	2.21	4.73	5.23	5.18	29.93	89.65	10.35
[6877] VILJOEN M. J. (1969)	KAAPVAAL CRATON_ARCHEAN / BARBERTON GREENSTONE BELT / ONVERWACHT GROUP / KOMATI FORMATION	VOLCANIC ROCK	KOMATIITE, PERIDOTITIC	42.67	0.3	3.33	6.28	4.74	4.49	29.03	90.84	9.16
[6877] VILJOEN M. J. (1969)	KAAPVAAL CRATON_ARCHEAN / BARBERTON GREENSTONE BELT / ONVERWACHT GROUP / KOMATI FORMATION	VOLCANIC ROCK	KOMATIITE, PERIDOTITIC	41.58	0.38	3.44	5.2	6.01	5.99	26.71	89.31	10.69
[6877] VILJOEN M. J. (1969)	KAAPVAAL CRATON_ARCHEAN / BARBERTON GREENSTONE BELT / ONVERWACHT GROUP / KOMATI FORMATION	VOLCANIC ROCK	KOMATIITE, PERIDOTITIC	41.14		2.14	6.02	3.24	2.34	31.46	86.34	13.66
[6877] VILJOEN M. J. (1969)	KAAPVAAL CRATON_ARCHEAN / BARBERTON GREENSTONE BELT / ONVERWACHT GROUP / KOMATI FORMATION	VOLCANIC ROCK	KOMATIITE, PERIDOTITIC	43.4		2.73	5.85	4.39	4.14	29.12	89.63	10.37
[6886] MENELL R. P. (1986)	KAAPVAAL CRATON_ARCHEAN / KALKKLOOF SCHIST BELT / ONVERWACHT GROUP / TJAKASTAD SUBGROUP	VOLCANIC ROCK	KOMATIITE, PERIDOTITIC	40.44	0.19	3.75	5.61	5.85	0.31	30.66	86.81	13.19
[6886] MENELL R. P. (1986)	KAAPVAAL CRATON_ARCHEAN / KALKKLOOF SCHIST BELT / ONVERWACHT GROUP / TJAKASTAD SUBGROUP	VOLCANIC ROCK	KOMATIITE, BASALTIC	43.36	0.36	9.42	2.67	9.17	6.76	20.47	92.21	7.79
[7837] ANHAEUSSER C. R. (1977)	KAAPVAAL CRATON_ARCHEAN / ROODEKRANS GREENSTONE REMNANT / ROODEKRANS COMPLEX	VOLCANIC ROCK	KOMATIITE, PERIDOTITIC	41.78	0.22	5.06	5.28	4.53	3.95	29.69	90.51	9.49
[21048] HOFFMANN J. E. (2017)	KAAPVAAL CRATON_ARCHEAN / COMMONDALE GREENSTONE BELT / COMMONDALE ULTRAMAFIC SUITE (MATSHEMPONDO PERIDOTI	VOLCANIC ROCK	KOMATIITE	44.93	0.04	3.34	0.73	5.94	1.37	42.16	98.51	1.49
[5473] SRIKANTIA S. V. (1989)	DHARWAR CRATON_ARCHEAN / EASTERN DHARWAR CRATON / RAMAGIRI-HUNGUND GREENSTONE BELT / RAMAGIRI SCHIST BELT	VOLCANIC ROCK	KOMATIITE	44.05	0.24	6.12	0.97	6.29	2.55	29.79	90.01	9.99
[5473] SRIKANTIA S. V. (1989)	DHARWAR CRATON_ARCHEAN / EASTERN DHARWAR CRATON / RAMAGIRI-HUNGUND GREENSTONE BELT / RAMAGIRI SCHIST BELT	VOLCANIC ROCK	KOMATIITE	43.62	0.2	4.14	9.91	5.93	4.43	27.3	95.53	4.47
[5628] HUSSAIN S. M. (1982)	DHARWAR CRATON_ARCHEAN / WESTERN DHARWAR CRATON / HOLENAR(A)SIPUR SCHIST BELT	VOLCANIC ROCK	KOMATIITE	35.02	0.12	1.35	13.56	1.49	1.58	34.67	87.79	12.21
[5628] HUSSAIN S. M. (1982)	DHARWAR CRATON_ARCHEAN / WESTERN DHARWAR CRATON / HOLENAR(A)SIPUR SCHIST BELT	VOLCANIC ROCK	KOMATIITE	34.15	0.15	1.95	8.85	5.96	2.75	32	85.81	14.19
[5628] HUSSAIN S. M. (1982)	DHARWAR CRATON_ARCHEAN / WESTERN DHARWAR CRATON / HOLENAR(A)SIPUR SCHIST BELT	VOLCANIC ROCK	KOMATIITE	35.98	0.35	0.15	2.8	10.9	3.05	31.85	85.08	14.92
[5628] HUSSAIN S. M. (1982)	DHARWAR CRATON_ARCHEAN / WESTERN DHARWAR CRATON / HOLENAR(A)SIPUR SCHIST BELT	VOLCANIC ROCK	KOMATIITE	40.25	0.33	5.2	5.18	0.3	3.61	31.42	86.29	13.71
[5628] HUSSAIN S. M. (1982)	DHARWAR CRATON_ARCHEAN / WESTERN DHARWAR CRATON / HOLENAR(A)SIPUR SCHIST BELT	VOLCANIC ROCK	KOMATIITE	39.53	0.33	4.91	6.89	5.34	1.39	29.7	88.09	11.91
[5628] HUSSAIN S. M. (1982)	DHARWAR CRATON_ARCHEAN / WESTERN DHARWAR CRATON / HOLENAR(A)SIPUR SCHIST BELT	VOLCANIC ROCK	KOMATIITE	39.72	0.58	5.5	7.57	4.36	1.78	29.06	88.57	11.43
[5628] HUSSAIN S. M. (1982)	DHARWAR CRATON_ARCHEAN / WESTERN DHARWAR CRATON / HOLENAR(A)SIPUR SCHIST BELT	VOLCANIC ROCK	KOMATIITE	39	0.1	3.47	1.09	14.69	2.15	32.99	93.49	6.51
[5628] HUSSAIN S. M. (1982)	DHARWAR CRATON_ARCHEAN / WESTERN DHARWAR CRATON / HOLENAR(A)SIPUR SCHIST BELT	VOLCANIC ROCK	KOMATIITE	33.68	0.15	2.35	7.85	2.84	1.01	38.9	86.78	13.22
[5628] HUSSAIN S. M. (1982)	DHARWAR CRATON_ARCHEAN / WESTERN DHARWAR CRATON / HOLENAR(A)SIPUR SCHIST BELT	VOLCANIC ROCK	KOMATIITE	42.13	2.2	19.55	1.25	17.75	10.71	4.2	97.79	2.21
[5630] NARAYANA B. L. (1980)	DHARWAR CRATON_ARCHEAN / WESTERN DHARWAR CRATON / GHATTIHOSAHALLI BELT	VOLCANIC ROCK	KOMATIITE	44.71	0.2	3.94	3.34	3.8	2.42	34.75	93.16	6.84
[5630] NARAYANA B. L. (1980)	DHARWAR CRATON_ARCHEAN / WESTERN DHARWAR CRATON / GHATTIHOSAHALLI BELT	VOLCANIC ROCK	KOMATIITE, PERIDOTITIC	42.08	0.23	5.39	4.9	4.32	2.52	32.26	91.7	8.3
[5630] NARAYANA B. L. (1980)	DHARWAR CRATON_ARCHEAN / WESTERN DHARWAR CRATON / GHATTIHOSAHALLI BELT	VOLCANIC ROCK	KOMATIITE, PERIDOTITIC	39.58	0.19	4.14	8.91	2.46	1.3	35.86	92.44	7.56
[5630] NARAYANA B. L. (1980)	DHARWAR CRATON_ARCHEAN / WESTERN DHARWAR CRATON / GHATTIHOSAHALLI BELT	VOLCANIC ROCK	KOMATIITE, PERIDOTITIC	39.85	0.16	2.98	9.42	2	1.28	35.71	91.4	8.6
[5630] NARAYANA B. L. (1980)	DHARWAR CRATON_ARCHEAN / WESTERN DHARWAR CRATON / GHATTIHOSAHALLI BELT	VOLCANIC ROCK	KOMATIITE, PERIDOTITIC	41.61	0.19	3.52	7.18	3.5	2.47	31.12	89.59	10.41
[5630] NARAYANA B. L. (1980)	DHARWAR CRATON_ARCHEAN / WESTERN DHARWAR CRATON / GHATTIHOSAHALLI BELT	VOLCANIC ROCK	KOMATIITE, PERIDOTITIC	41.46	0.17	3.22	7.38	3.38	3.03	31.39	90.03	9.97
[5630] NARAYANA B. L. (1980)	DHARWAR CRATON_ARCHEAN / WESTERN DHARWAR CRATON / GHATTIHOSAHALLI BELT	VOLCANIC ROCK	KOMATIITE, PERIDOTITIC	41.4	0.29	3.21	8.76	3.1	0.87	31.87	89.5	10.5
[5630] NARAYANA B. L. (1980)	DHARWAR CRATON_ARCHEAN / WESTERN DHARWAR CRATON / GHATTIHOSAHALLI BELT	VOLCANIC ROCK	KOMATIITE, PERIDOTITIC	41.64	0.21	3.29	7.99	3.54	1.06	32	89.73	10.27
[5990] CHALOKWU C. I. (1983)	DHARWAR CRATON_ARCHEAN / WESTERN DHARWAR CRATON / GHATTIHOSAHALLI BELT	VOLCANIC ROCK	KOMATIITE	42.49	0.23	0.48	12.9	2.44	0.85	40.02	99.41	0.59
[5990] CHALOKWU C. I. (1983)	DHARWAR CRATON_ARCHEAN / WESTERN DHARWAR CRATON / GHATTIHOSAHALLI BELT	VOLCANIC ROCK	KOMATIITE	43.48	0.33	0.97	12.29	4.22	0.1	37.75	99.14	0.86
[7336] JAFRI S. H. (1983)	DHARWAR CRATON_ARCHEAN / WESTERN DHARWAR CRATON / NUGGIHALLI SCHIST BELT	VOLCANIC ROCK	KOMATIITE, PERIDOTITIC	42.93	0.1	3.64	6.73	2.49	1.74	35.99	93.62	6.38
[7336] JAFRI S. H. (1983)	DHARWAR CRATON_ARCHEAN / WESTERN DHARWAR CRATON / NUGGIHALLI SCHIST BELT	VOLCANIC ROCK	KOMATIITE, PERIDOTITIC	43.84	0.13	3.5	4.3	3.92	1.23	35.33	92.25	7.75
[7336] JAFRI S. H. (1983)	DHARWAR CRATON_ARCHEAN / WESTERN DHARWAR CRATON / NUGGIHALLI SCHIST BELT	VOLCANIC ROCK	KOMATIITE, PERIDOTITIC	42.66	0.15	6.97	3.23	5.62	5.04	29.89	93.56	6.44
[7336] JAFRI S. H. (1983)	DHARWAR CRATON_ARCHEAN / WESTERN DHARWAR CRATON / NUGGIHALLI SCHIST BELT	VOLCANIC ROCK	KOMATIITE, PERIDOTITIC	39.98	0.12	4.73	3.43	7.69	1.12	30.91	87.98	12.02
[7336] JAFRI S. H. (1983)	DHARWAR CRATON_ARCHEAN / WESTERN DHARWAR CRATON / NUGGIHALLI SCHIST BELT	VOLCANIC ROCK	KOMATIITE, PERIDOTITIC	41.5	0.2	5.35	2.41	4.92	4.88	30.56	89.82	10.18
[7336] JAFRI S. H. (1983)	DHARWAR CRATON_ARCHEAN / WESTERN DHARWAR CRATON / NUGGIHALLI SCHIST BELT	VOLCANIC ROCK	KOMATIITE, PERIDOTITIC	44.53	0.23	4.34	2.77	7.53	4.7	26.56	90.66	9.34
[7336] JAFRI S. H. (1983)	DHARWAR CRATON_ARCHEAN / WESTERN DHARWAR CRATON / NUGGIHALLI SCHIST BELT	VOLCANIC ROCK	KOMATIITE, PERIDOTITIC	42.96	0.13	2.24	2.32	6.67	2.32	35.67	92.31	7.69
[7336] JAFRI S. H. (1983)	DHARWAR CRATON_ARCHEAN / WESTERN DHARWAR CRATON / NUGGIHALLI SCHIST BELT	VOLCANIC ROCK	KOMATIITE, PERIDOTITIC	43.13	0.23	5.35	1.74	6.64	3.88	31.68	92.65	7.35
[7336] JAFRI S. H. (1983)	DHARWAR CRATON_ARCHEAN / WESTERN DHARWAR CRATON / NUGGIHALLI SCHIST BELT	VOLCANIC ROCK	KOMATIITE, PERIDOTITIC	41.6	0.31	5.03	2.21	6.64	4.71	31.12	91.62	8.38
[7336] JAFRI S. H. (1983)	DHARWAR CRATON_ARCHEAN / WESTERN DHARWAR CRATON / NUGGIHALLI SCHIST BELT	VOLCANIC ROCK	KOMATIITE, PERIDOTITIC	44.62	0.21	5.35	2.39	6.3	2.24	32.81	93.92	6.08
[7336] JAFRI S. H. (1983)	DHARWAR CRATON_ARCHEAN / WESTERN DHARWAR CRATON / NUGGIHALLI SCHIST BELT	VOLCANIC ROCK	KOMATIITE, PERIDOTITIC	43.78	0.1	3.08	3.21	7.01	2.86	32.36	92.4	7.6
References
[8808] Chen S., Morris P. A., Pirajno F., 2005, Occurrence of komatiites in the sandstone greenstone belt, north-central Yilgarn Craton: Australian Journal of Earth Sciences, v. 52, p. 959–963.
[14980] Fiorentini M. L., Barnes S. J., Maier W. D., Burnham O. M., Heggie G. J., 2011, Global variability in the platinum-group element contents of komatiites: Journal of Petrology, v. 52, p. 83–112.
[15917] Thebaud N., Barnes S. J., Fiorentini M. L., 2012, Komatiites of the Wildara-Leonora Belt, Yilgarn Craton, WA: The missing link in the Kalgoorlie Terrane?: Precambrian Research, v. 196, p. 234–246.
[17508] Godel B. M., Barnes S. J., Barnes S. J., 2013, Deposition mechanisms of magmatic sulphide liquids: evidence from high-resolution x-ray computed tomography and trace element chemistry of komatiite-hosted disseminated sulphides: Journal of Petrology, v. 54, p. 1455–1481.
[23187] Staude S., Goll R. M., 2019, Remnant lenses of komatiitic dykes in Kambalda (Western Australia): occurrences, textural variations, emplacement model, and implications for other komatiite provinces: Lithos, v. 342, p. 206–222.
[5891] Innes D. G., 1978, Some chemical characteristics of ultramafic and tholeiitic rocks, Newton Township, district of Sudbury: Ontario Geological Survey, Miscellaneous Paper, v. 82, p. 225–227.
[8321] Pyke D. R., Naldrett A. J., Eckstrand O. R., 1973, Archean ultramafic flows in Munro Township, Ontario: Geological Society of America Bulletin, v. 84, p. 955–978.
[14400] Dauphas N., Teng F., Arndt N. T., 2010, Magnesium and iron isotopes in 2.7 Ga Alexo komatiites: mantle signatures, no evidence for Soret diffusion, and identification of diffusive transport in zoned olivine: Geochimica et Cosmochimica Acta, v. 74, p. 3274–3291.
[5278] Jahn B. M., Schrank A., 1983, REE geochemistry of komatiites and associated rocks from Piumhi, southeastern Brazil: Precambrian Research, v. 21, p. 1–20.
[5625] Teixeira N. A., Danni J. C. M., 1979, Petrology of ultrabasic and basic lavas of the volcano-sedimentary morro do ferro sequence, fortaleza de minas (mg): Revista Brasileira de Geociências, v. 9, p. 151–158.
[5133] Anhaeusser C. R., 2001, The geology and geochemistry of the nelshoogte schist belt and adjacent stolzburg layered ultramafic complex, Barberton greenstone belt, south Africa: University of the Witwatersrand, Department of Geology, Economic Geology Research Institute, v. 351, p. 1–44.
[5421] Hermann A. G., Blanchard D. P., Haskin M. A., Jacobs J. W., Knake D., Korotev R. L., Brannon J. C., 1976, Major, minor and trace element compositions of peridotitic and basaltic komatiites from the precambrian crust of Southern Africa: Contributions to Mineralogy and Petrology, v. 59, p. 1–12.
[5590] Smith H. S., Erlank A. J., 1982, Geochemistry and petrogenesis of komatiites from the Barberton greenstone belt, South Africa: pp. 347–397.
[5626] Viljoen M. J., Viljoen R. P., 1969, The geology and geochemistry of the lower ultramafic unit of the Onverwacht Group and a proposed new class of igneous rocks: Geological Society of South Africa Special Publication, v. 2, p. 55–85.
[6843] De Wit M. J., Hart R. A., Hart R. J., 1987, The Jamestown Ophiolite Complex, Barberton Mountain belt: a section through 3.5 Ga oceanic crust: Journal of African Earth Sciences, v. 6, p. 681–730.
[6877] Viljoen M. J., Viljoen R. P., 1969, Evidence for the existence of a mobile extrusive peridotitic magma from the Komati Formation of the Onverwacht Group: Geological Society of South Africa Special Publication, v. 2, p. 87–112.
[6886] Menell R. P., Brewer T. S., Delve J. R., Anhaeusser C. R., 1986, The Kalkkloof chrysotile asbestos deposit and surrounding area, Barberton Mountain Land, in Anhaeusser, C. R., Maske, S. eds., Mineral deposits of South Africa, p. 427–435.
[7837] Anhaeusser C. R., 1977, Geological and geochemical investigations of the Roodekrans ultramafic complex and surrounding Archean volcanic rocks, Krugersdorp District: South African Journal of Geology, v. 80, p. 17–28.
[21048] Hoffmann J. E., Wilson A. H., 2017, The origin of highly radiogenic Hf isotope compositions in 3.33 Ga Commondale komatiite lavas (South Africa): Chemical Geology, v. 455, p. 6–21.
[5473] Srikantia S. V., Venkataramana P., 1989, The Archean komatiites of Nagamangala supracrustal belt, Karnataka: Geological Society of India, v. 33, p. 210–214.
[5628] Hussain S. M., Naqvi S. M., Rao T. G., 1982, Geochemistry and significance of mafic-ultramafic rocks from the southern part of the Holenarasipur schist belt, Karnataka: Geological Society of India, v. 23, p. 19–31.
[5630] Narayana B. L., Naqvi S. M., 1980, Geochemistry of spinifex-textured peridotitic komatiites from Ghatti Hosahalli, Karnataka, India: Geological Society of India, v. 21, p.194–198.
[5990] Chalokwu C. I., Sood M. K., 1983, Komatiites from Southern India: Indian Geological society bulletin, v. 16, p. 1–11.
[7336] Jafri S. H., Khan N., Ahmed S. M., Saxena R., 1983, Geology and geochemistry of Nuggihalli schist belt, Dharwar craton, Karnataka, India: Geological Society of Indian, v. 4, p.110–120.
